# Supplementary material for: Assessment of Titanate Nanolayers in Terms of Their Physicochemical and Biological Properties
Source: MDPI journal article supplement (doi:10.3390/ma14040806), 2021-02-08
Supplement: s1 [file s1]

# Assessment of Titanate Nanolayers in Terms of Their Physicochemical and Biological Properties

Michalina Ehlert <sup>1,2</sup>, Aleksandra Radtke <sup>1,2,\*</sup>, Katarzyna Roszek <sup>3</sup>, Tomasz Jędrzejewski <sup>3</sup> and Piotr Piszczek <sup>1,2,\*</sup>

<sup>1</sup> Faculty of Chemistry, Nicolaus Copernicus University in Toruń, Gagarina 7, 87-100 Toruń, Poland; m.ehlert@doktorant.umk.pl

<sup>2</sup> Nano-implant Ltd., Gagarina 5/102, 87-100 Toruń, Poland

<sup>3</sup> Faculty of Biological and Veterinary Sciences, Nicolaus Copernicus University in Toruń, Lwowska 1, 87-100 Toruń, Poland; kroszek@umk.pl (K.R.); tomaszj@umk.pl (T.J.)

\* Correspondence: aradtke@umk.pl (A.R.); pischczek@umk.pl (P.P.); Tel.: +48-60-032-12-94 (A.R.); +48-60-788-33-57 (P.P.)

**Citation:** Ehlert, M.; Radtke, A.; Roszek, K.; Jędrzejewski, T.; Piszczek, P. Assessment of Titanate Nanolayers in Terms of Their Physicochemical and Biological Properties. *Materials* **2021**, *14*, 806. <https://doi.org/10.3390/ma14040806>

Academic Editor: Carla Renata Arciola

Received: 5 January 2021

Accepted: 1 February 2021

Published: 8 February 2021

**Publisher's Note:** MDPI stays neutral with regard to jurisdictional claims in published maps and institutional affiliations.

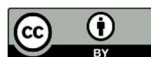

**Copyright:** © 2021 by the authors. Licensee MDPI, Basel, Switzerland. This article is an open access article distributed under the terms and conditions of the Creative Commons Attribution (CC BY) license (<http://creativecommons.org/licenses/by/4.0/>).

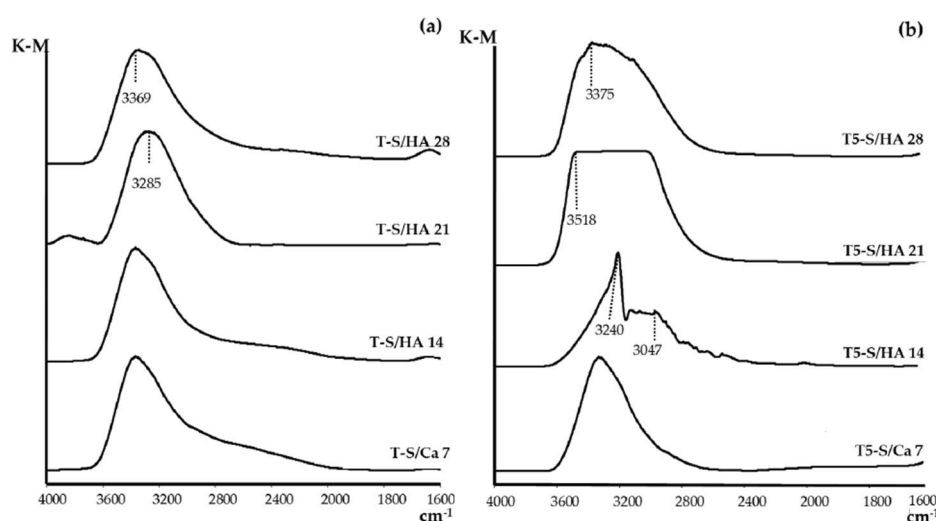

**Figure S1.** DRIFT spectra (1600–4000 cm<sup>−1</sup>) of studied T-S/Ca and T-S/HA (a), T5-S/Ca and T5-S/HA (b) after immersing in SBF for 7, 14, 21 and 28 days.
